# Supplementary material for: Enhanced detection of toxicity in wastewater using a 2D smooth anode based microbial fuel cell toxicity sensor
Source: Royal Society of Chemistry journal article supplement (doi:10.1039/c8ra10337b), 2019-01-01
Supplement: c8ra10337b1.pdf [file c8ra10337b1.pdf]

## **Enhanced detection of toxicity in wastewater using 2D smooth plane anode based microbial fuel cell toxicity sensor**

Jianfeng Li <sup>#</sup>, Jingping Hu <sup>#</sup>, Changzhu Yang, Wenhong Pu, Huijie Hou, Jikun Xu,  
Bingchuan Liu<sup>\*</sup>, Jiakuan Yang<sup>\*</sup>

\* Corresponding author: Prof. Bingchuan Liu, E-mail: [Bingchuan@hust.edu.cn](mailto:Bingchuan@hust.edu.cn); Prof.  
Jiakuan Yang, E-mail: [jkyang@hust.edu.cn](mailto:jkyang@hust.edu.cn), Tel: +86-27-87793948; Fax: +86-27-  
87792101

<sup>#</sup> These two authors contributed equally to this paper.

*School of Environmental Science and Engineering, Huazhong University of Science  
and Technology (HUST), Wuhan, 430074, P R China*

*Hubei Provincial Engineering Laboratory of Solid Waste Treatment, Disposal and  
Recycling, 1037 Luoyu Road, Wuhan, Hubei, 430074, China*

**Table S1. The concentration of the free lead ions in MFCs**

| Detection of free ions of lead by ICP-OES |                        |
|-------------------------------------------|------------------------|
| Theoretical concentration                 | Actual concentration   |
| 1.0 mg/L                                  | $0.989 \pm 0.011$ mg/L |
| 2.0 mg/L                                  | $1.916 \pm 0.027$ mg/L |

**Table S2. The pH change of wastewater after introduction of lead nitrate standard solution**

|                                       | 30 min          | 60 min          | 120 min         |
|---------------------------------------|-----------------|-----------------|-----------------|
| Wastewater                            | $9.18 \pm 0.03$ | $9.18 \pm 0.03$ | $9.18 \pm 0.02$ |
| Wastewater+ 1.0 mg/L Pb <sup>2+</sup> | $9.15 \pm 0.02$ | $9.15 \pm 0.02$ | $9.15 \pm 0.04$ |
| Wastewater+ 2.0 mg/L Pb <sup>2+</sup> | $9.13 \pm 0.04$ | $9.13 \pm 0.05$ | $9.12 \pm 0.05$ |

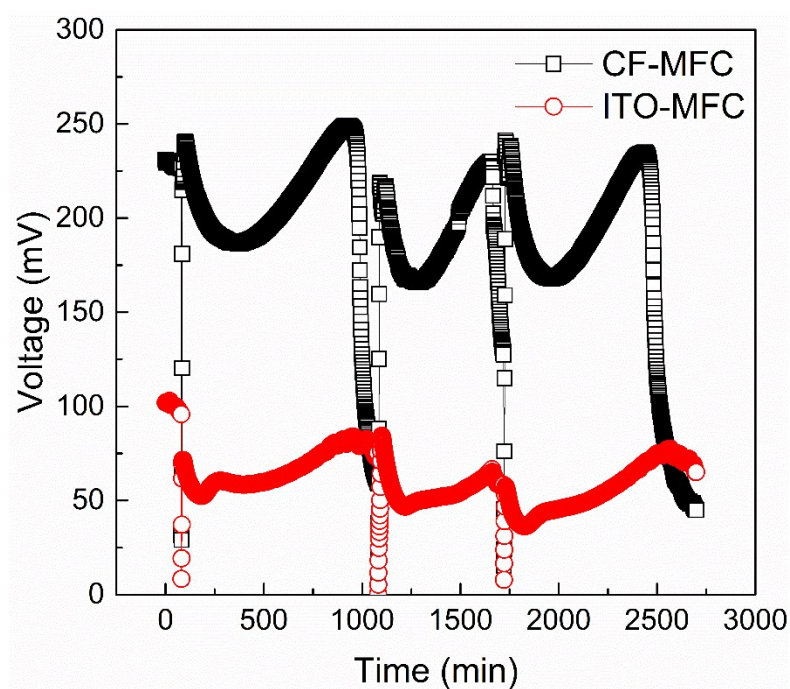**Fig. S1.** The voltage output of three consecutive cycles of the MFC sensors.

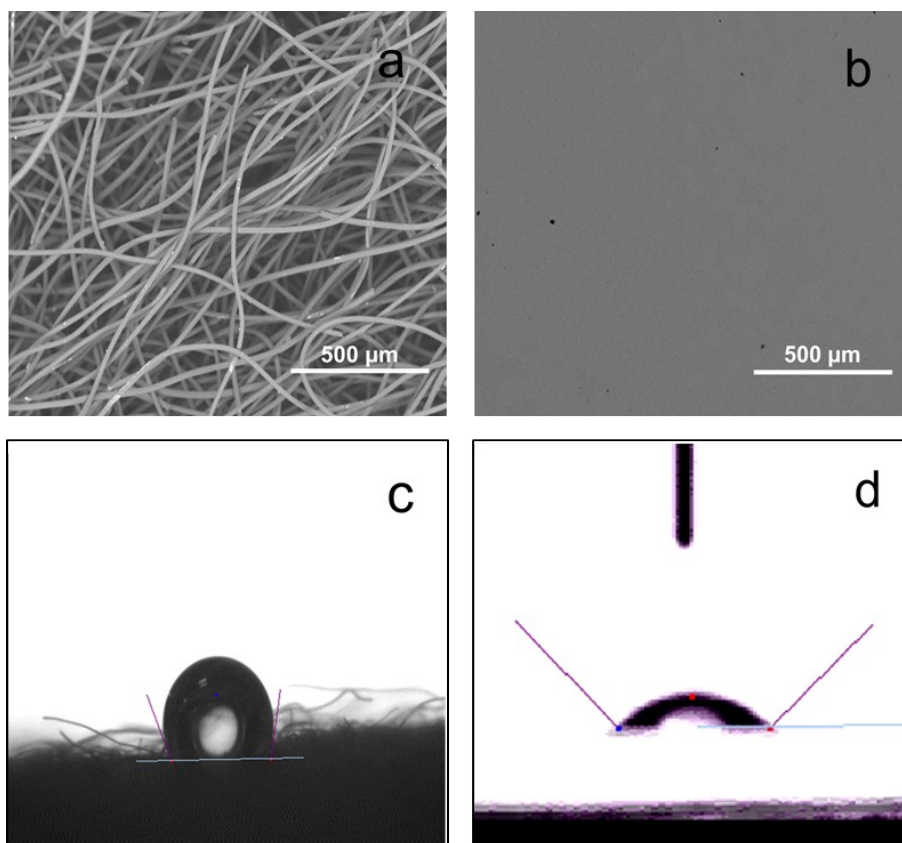

**Fig. S2.** SEM image of pristine anodes: (a) carbon felt and (b) ITO film. Water contact angles of pristine anodes: (c) carbon felt and (d) ITO film.

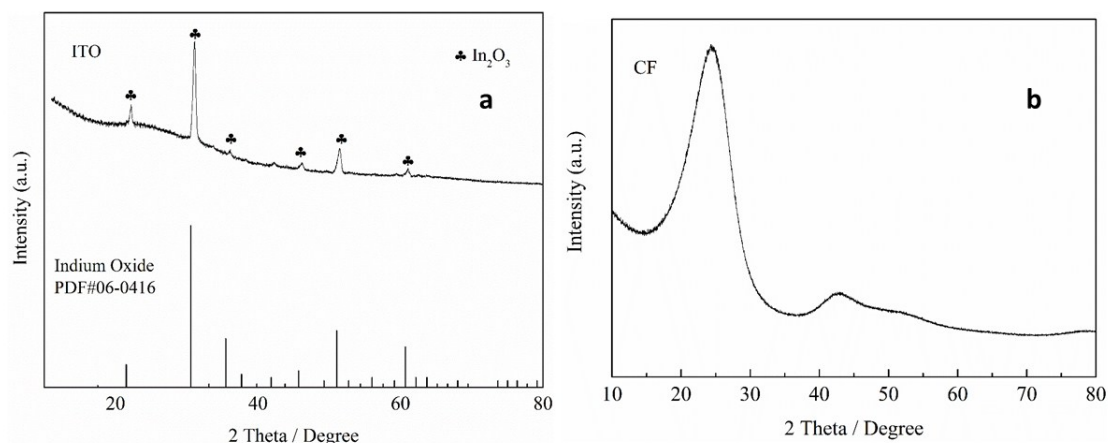

**Fig.S3.** XRD patterns of (a) ITO anode and (b) CF anode

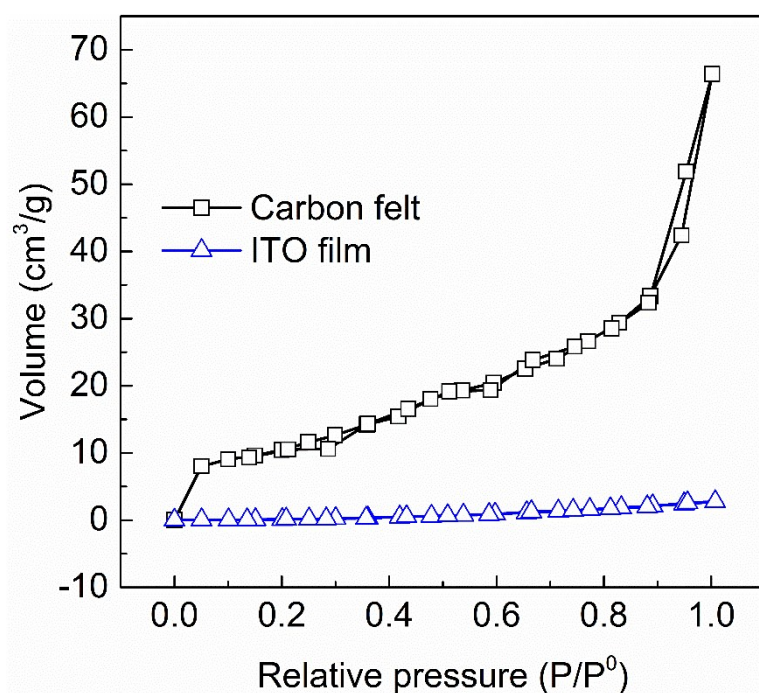

**Fig. S4.** N<sub>2</sub> adsorption – desorption isotherm plot of carbon felt and ITO film.

N<sub>2</sub> adsorption/desorption isotherms at 77 K were measured on BET relative surface area analyzer. Samples were filled in a tube and allowed to dry for 4 h at 100 °C prior to the measurements. After the test, 4~5 data points were selected to make the diagram and then the slope and intercept were calculated. The relative surface area was then calculated based on the BET equation.<sup>1</sup>

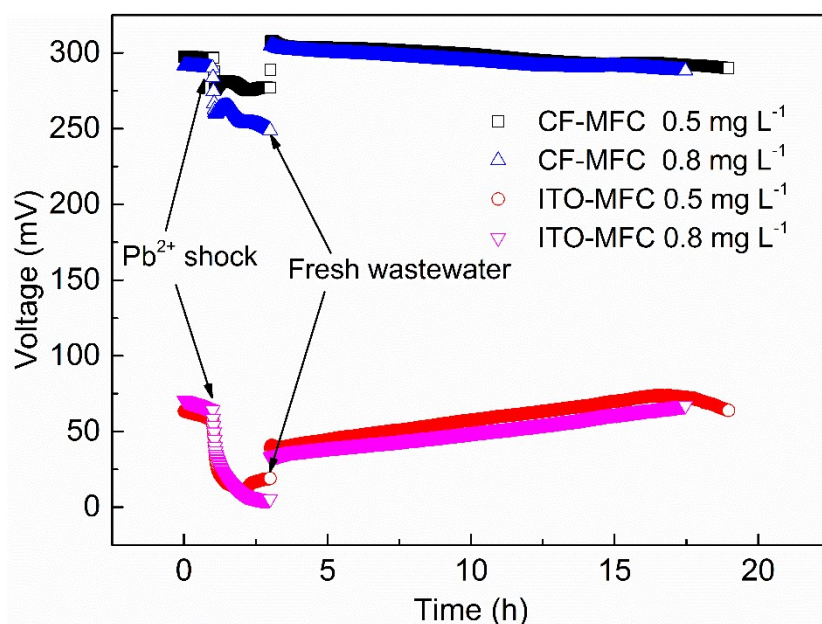

**Fig. S5** Voltage recovery of MFC sensors with fresh wastewater and 300 mg L<sup>-1</sup> sodium acetate after 0.5mg L<sup>-1</sup> and 0.8 mg L<sup>-1</sup> Pb<sup>2+</sup> shocks

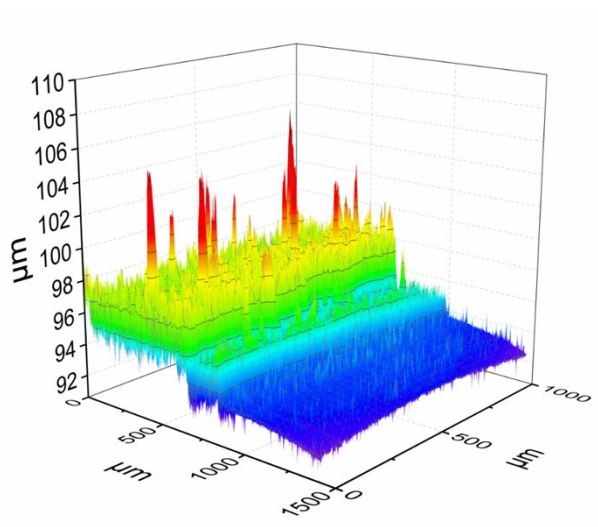

**Fig. S6.** Confocal laser scanning microscopy image of anodic biofilm cultivated on ITO film surface (part of the biofilm was scratched using a clean scalpel to show the biofilm thickness). The biofilm was cultivated for a month using half municipal wastewater and half PBS solution.

**Reference**

- 1 S. Brunauer, P.H. Emmett, E. Teller, Adsorption of Gases in Multimolecular Layers, J. Am. Chem. Soc. 60 (1938) 309-319.
